# Supplementary material for: Effect of millimetre waves on phosphatidylcholine membrane models: a non-thermal mechanism of interaction
Source: Royal Society of Chemistry journal article supplement (doi:10.1039/c4sm00551a), 2014-01-01
Supplement: c4sm00551a1.pdf [file c4sm00551a1.pdf]

## Supporting Information

### Biological effects of millimeter waves: a nonthermal mechanism based on the interaction with biological membranes

Amerigo Beneduci\*, Katia Cosentino, Stefania Romeo, Rita Massa and Giuseppe Chidichimo

\* Department of Chemistry and Chemical Technologies, University of Calabria, Arcavacata di Rende (CS), Italy. Fax: +390984492041; Tel: +390984492117; E-mail: amerigo.beneduci@unical.it

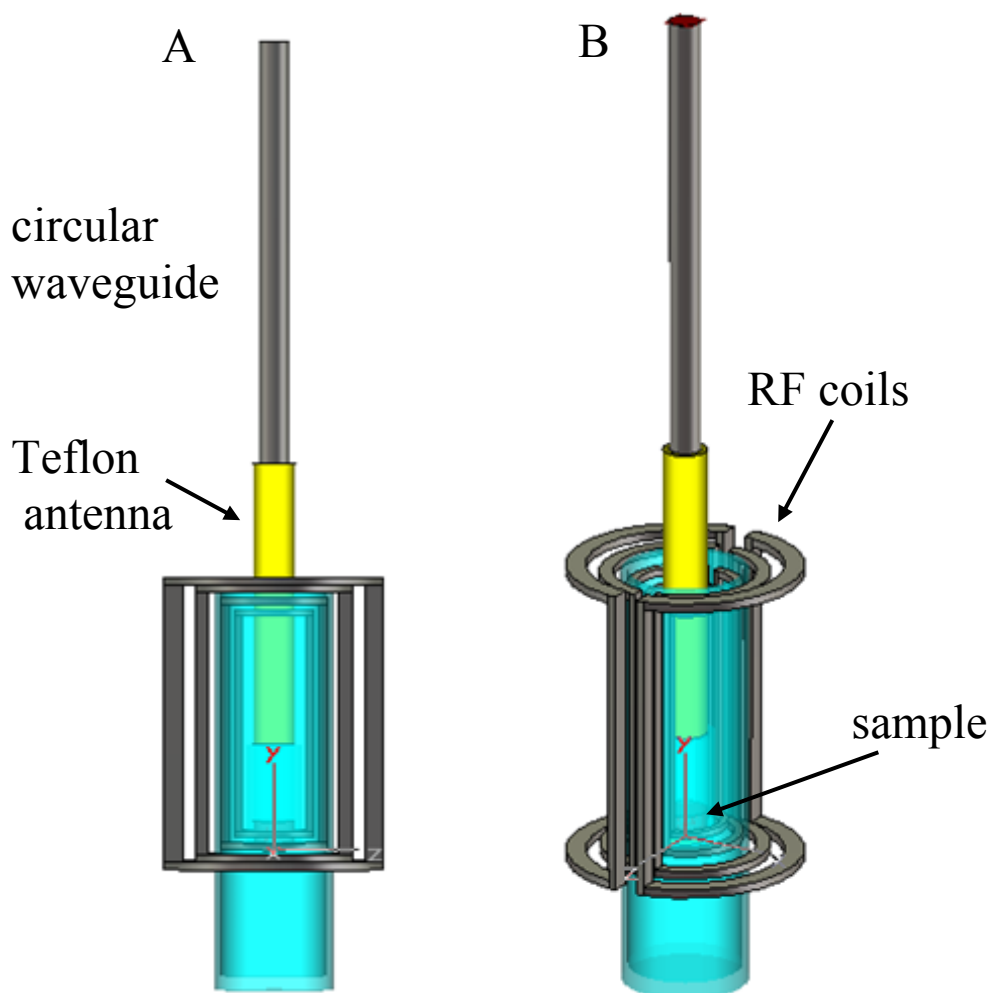

Figure S1. Model of the MMWs applicator for dosimetric calculations inside the NMR probe. A. Front view; B. Perspective view. The dielectric antenna was made up of Teflon, with a radius of 3 mm and height of 40 mm. At the end of the dielectric antenna the quartz cuvette (internal radius 3 mm, height 15 mm) filled with the sample (3 mm thick) has been modelled. Two saddle coils were also included in the model to simulate the RF coils of the NMR probe.
